# Supplementary material
Source: publisher figshare collection journal article supplement (https://acs.figshare.com/ndownloader/files/18812675)
Supplement: Supplementary file 1 [file 18812675]

## Effects of camphor oil addition to diesel on the nanostructures and oxidative reactivity of combustion-generated soot

Pranay P. Morajkar<sup>a,b</sup>, Gerardo D.J. Guerrero Peña<sup>c</sup>, Abhijeet Raj<sup>a,\*</sup>, Mirella Elkadi<sup>d</sup>, Ramees K. Rahman<sup>e</sup>, Akshay V. Salkar<sup>b</sup>, Avin Pillay<sup>d</sup>, Tharalekshmy Anjana<sup>a</sup>, Min Suk Cha<sup>c</sup>

<sup>a</sup>Department of Chemical Engineering, The Petroleum Institute, Khalifa University of Science & Technology, Abu Dhabi, U.A.E

<sup>b</sup>School of Chemical Sciences, Goa University, Taleigao Plateau, Goa, India

<sup>c</sup>Clean Combustion Research Centre, King Abdullah University of Science and Technology, Thuwal, Saudi Arabia

<sup>d</sup>Department of Chemistry, Khalifa University of Science & Technology, Abu Dhabi, U.A.E

<sup>e</sup>Department of Chemical Engineering, University of Central Florida, Orlando, US

---

### Supplementary Information

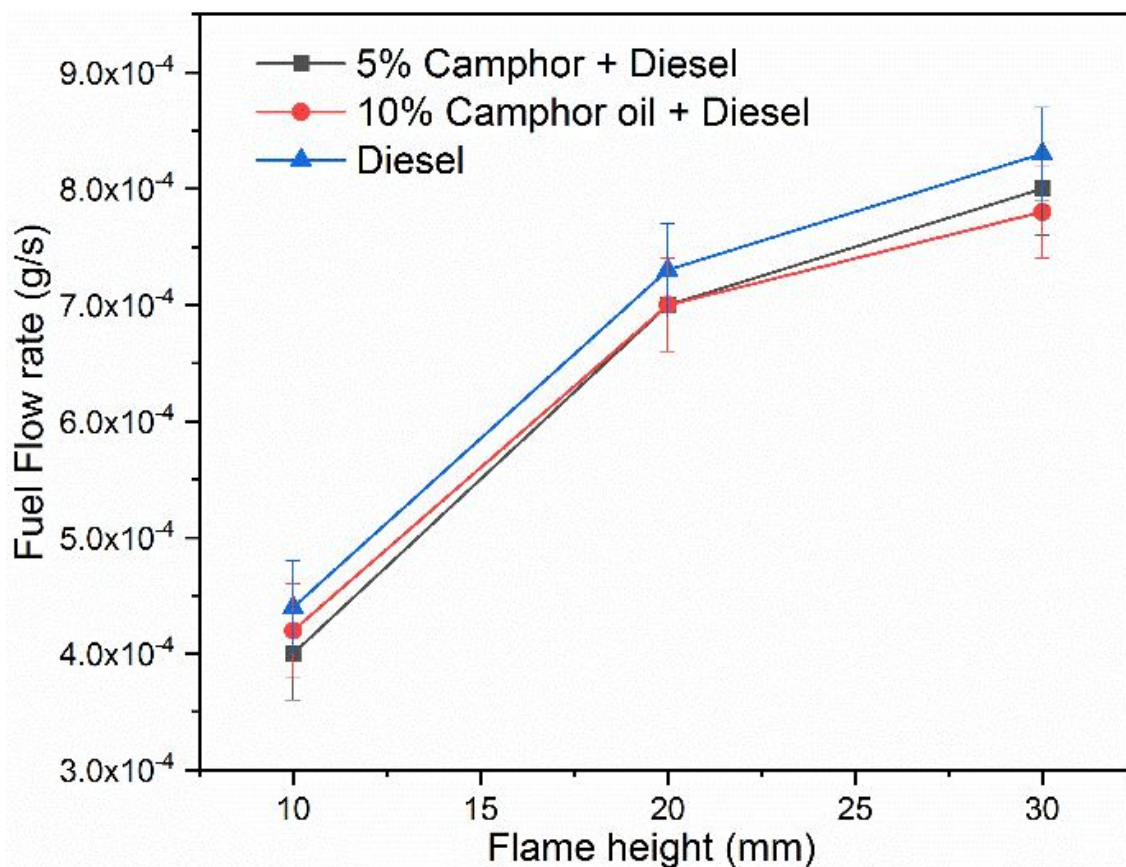

Figure SF1: Measured fuel flow rate as function of flame height for the 5% CD, 10% COD and pure diesel.

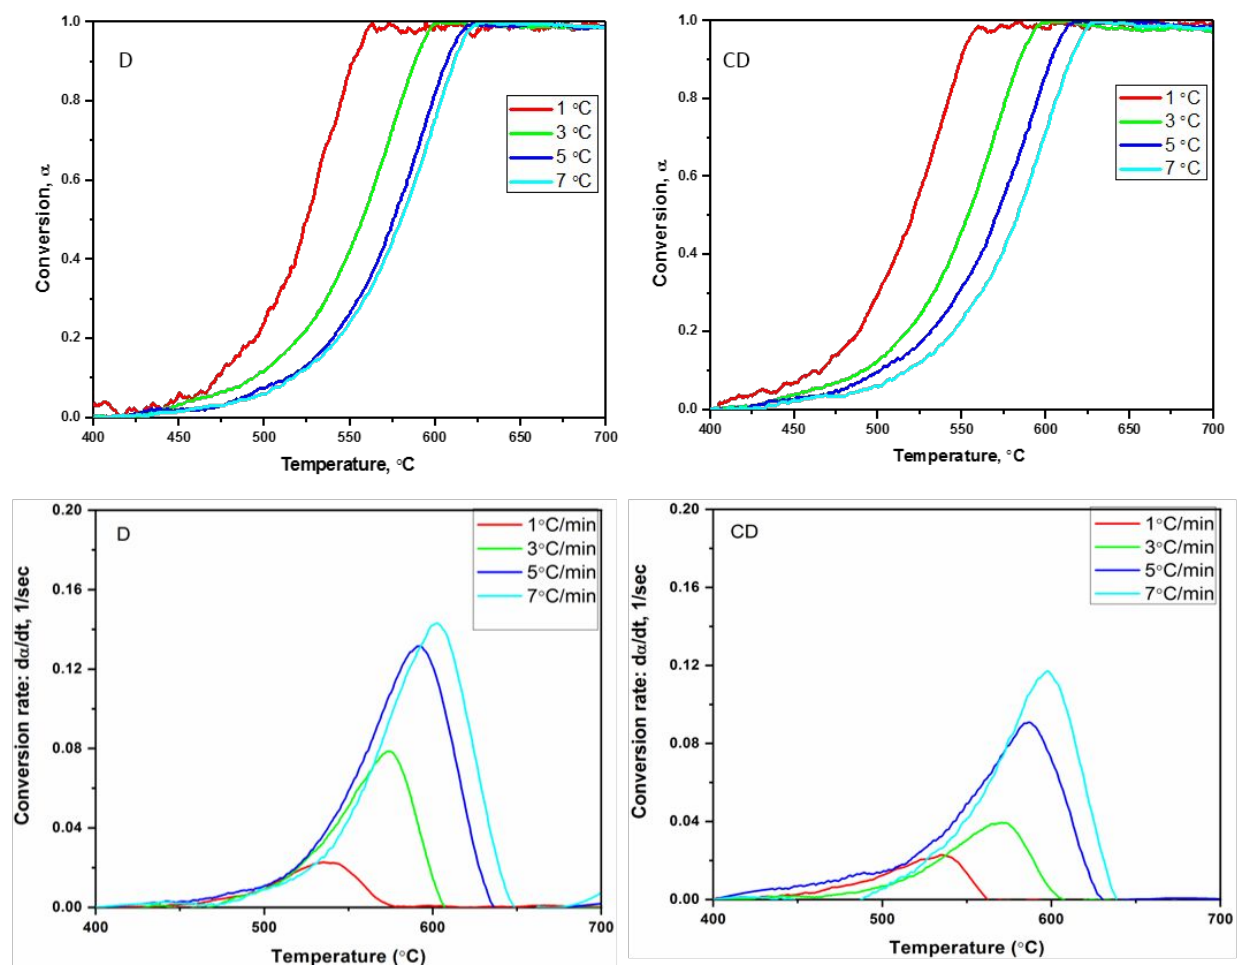

Figure SF2: Soot conversion,  $\alpha$  and soot conversion rate ( $d\alpha/dt$ ) measured in air at different heating rates for pure diesel (D) and 5% Camphor oil-diesel (CD) soot samples.
